# Supplementary material
Source: MDPI journal article supplement (https://www.mdpi.com/2073-4441/14/16/2525)
Supplement: s1 [file s1]

**Table S1.** The statistical table of main quantity elements of hot spring water samples.

| Sampling Time |                     | Temp  | TDS    | pH   |       | EC    | Na <sup>+</sup> | K <sup>+</sup> | Mg <sup>2+</sup> | Ca <sup>2+</sup> | F      | Cl <sup>-</sup> | NO <sub>3</sub> <sup>-</sup> | SO <sub>4</sub> <sup>2-</sup> | CO <sub>3</sub> <sup>2-</sup> | HCO <sub>3</sub> <sup>-</sup> | Hydrochemical           |
|---------------|---------------------|-------|--------|------|-------|-------|-----------------|----------------|------------------|------------------|--------|-----------------|------------------------------|-------------------------------|-------------------------------|-------------------------------|-------------------------|
| No.           | (day month<br>year) | (°C)  | (mg/L) |      |       | μs/cm |                 |                |                  |                  | (mg/L) |                 |                              |                               |                               |                               |                         |
| S1            | 22 February         | 33.3  | 380    | 7.05 | 669   | 27.6  | 4.62            | 5.49           | -                | 4.1              | 16.1   | 6.57            | -                            | 9.47                          | -                             | 416.1                         | Ca-HCO <sub>3</sub>     |
|               | 15 March 2015       | 93    | 310    | 9.02 | 595   | 128   | 5.49            | -              | -                | -                | -      | -               | -                            | -                             | -                             | -                             | Na-HCO <sub>3</sub>     |
|               | 23 January 2016     | 53    | 320    | 8.29 | 515   | 138   | 6.58            | 0.28           | 5.55             | 1.47             | 6.74   | -               | 10.93                        | 16.95                         | 272.3                         | -                             | Na-HCO <sub>3</sub>     |
|               | 21 February         | 76    | 350    | 8.22 | 549   | 154   | 7.62            | 0.22           | 5.29             | 16.1             | 7.03   | -               | 14.21                        | -                             | 300.5                         | -                             | Na-HCO <sub>3</sub>     |
|               | 16 March 2018       | 77.6  | 350    | 8.19 | 544   | 133   | 6.75            | 0.54           | 7.26             | 16.4             | 5.86   | -               | 7.76                         | 51.48                         | 236.2                         | -                             | Na-HCO <sub>3</sub>     |
| S2            | 2 May 2019          | 80.6  | 340    | -    | -     | 136   | 5.03            | 0.26           | 6.74             | 16.4             | 6.19   | 0.43            | 7.33                         | 54.32                         | 213.9                         | -                             | Na-HCO <sub>3</sub>     |
|               | Average             | 76.04 | 330    | 8.43 | 550.8 | 138   | 6.29            | 0.26           | 5.79             | 13.3             | 6.48   | 0.43            | 9.94                         | 40.92                         | 259.6                         | -                             | Na-HCO <sub>3</sub>     |
|               | 21 February         | 43    | 650    | 6.82 | 1139  | 96.9  | 7.02            | 42             | 112              | 3.18             | 63.2   | 1.81            | 16.8                         | -                             | 612.4                         | -                             | Na(Ca)-HCO <sub>3</sub> |
| S3            | 15 March 2015       | 39.2  | 630    | 8.17 | 961   | 92.3  | 6.54            | 37             | 113              | 1.99             | 63.8   | -               | 15.04                        | -                             | 609.3                         | -                             | Na(Ca)-HCO <sub>3</sub> |
|               | 23 January 2016     | 26.3  | 700    | 6.89 | 1185  | 99    | 6.98            | 40.7           | 123              | 0.09             | 66.8   | 2.66            | 19.69                        | -                             | 679                           | -                             | Na(Ca)-HCO <sub>3</sub> |
|               | 21 February         | 38.9  | 690    | 6.8  | 1207  | 104   | 7.2             | 41.1           | 123              | 3.08             | 67.3   | 3.02            | 16.53                        | -                             | 652.1                         | -                             | Na(Ca)-HCO <sub>3</sub> |
|               | 16 March 2018       | 38.61 | 420    | 6.84 | 1220  | 101   | 7.22            | 38.9           | 9.83             | 0.54             | 70.6   | 2.01            | 15.66                        | 41.58                         | 271.1                         | -                             | Na-HCO <sub>3</sub>     |
|               | Average             | 35.75 | 610    | 7.18 | 1143  | 99.1  | 6.99            | 39.5           | 92.2             | 1.42             | 67.1   | 2.56            | 16.73                        | 41.58                         | 552.8                         | -                             | Na-HCO <sub>3</sub>     |
| S4            | 14 March 2018       | 62.03 | 560    | 6.83 | 914   | 137   | 10.6            | 15.7           | 66.9             | 4.96             | 25.5   | -               | 14.69                        | 84.48                         | 400.6                         | -                             | Ca(Na)-HCO <sub>3</sub> |
|               | 6 May 2019          | 62.3  | 590    | -    | -     | 137   | 10.4            | 14.6           | 66.7             | 4.8              | 25.7   | 1.31            | 13.52                        | 68.76                         | 485.9                         | -                             | Ca(Na)-HCO <sub>3</sub> |
|               | Average             | 62.17 | 570    | 6.83 | 914   | 137   | 10.5            | 15.1           | 66.8             | 4.88             | 25.6   | 1.31            | 14.1                         | 76.62                         | 443.2                         | -                             | Ca(Na)-HCO <sub>3</sub> |

“—” represent no data.

Continued Table S1

| No. | Sampling Time    |       | TDS  | pH     |       | EC   | Na <sup>+</sup> | K <sup>+</sup> | Mg <sup>2+</sup> | Ca <sup>2+</sup> | F    | Cl <sup>-</sup> | NO <sub>3</sub> <sup>-</sup> | SO <sub>4</sub> <sup>2-</sup> | CO <sub>3</sub> <sup>2-</sup> | HCO <sub>3</sub> <sup>-</sup>              | Hydrochemical Type |
|-----|------------------|-------|------|--------|-------|------|-----------------|----------------|------------------|------------------|------|-----------------|------------------------------|-------------------------------|-------------------------------|--------------------------------------------|--------------------|
|     | (day month year) | (°C)  |      | (mg/L) | µs/cm |      |                 |                |                  |                  |      |                 |                              |                               |                               |                                            |                    |
| S6  | 20 February      | 37    | 670  | 6.74   | 1025  | 49.9 | 6.95            | 30.5           | 159              | 1.07             | 19.2 | 4               | 111.8                        | -                             | 571.4                         | Ca-HCO <sub>3</sub>                        |                    |
|     | 16 March 2018    | 37.04 | 320  | 6.88   | 1048  | 50.7 | 8.1             | 26.5           | 20               | 0.52             | 16.5 | 3.42            | 91.73                        | 25.74                         | 148.3                         | Mg(Na)-SO <sub>4</sub> (HCO <sub>3</sub> ) |                    |
|     | Average          | 37.02 | 490  | 6.81   | 1037  | 50.3 | 7.52            | 28.5           | 89.7             | 0.79             | 17.8 | 3.71            | 101.7                        | 25.74                         | 359.8                         |                                            |                    |
| S7  | 16 March 2018    | 37.89 | 320  | 7.05   | 932   | 53.4 | 6.48            | 27.5           | 20               | 0.7              | 14.6 | 6.5             | 97.88                        | 25.74                         | 139.6                         | Mg-SO <sub>4</sub> (HCO <sub>3</sub> )     |                    |
|     | 19 February 2017 | 74    | 300  | 8.1    | 442   | 110  | 4.32            | 0.35           | 7.61             | 8.57             | 3.6  | -               | 93.4                         | -                             | 139.8                         | Na-SO <sub>4</sub> (HCO <sub>3</sub> )     |                    |
|     | 15 March 2018    | 76.2  | 280  | 8.24   | 407   | 95.5 | 4.35            | 0.13           | 6.92             | 8.48             | 2.85 | -               | 68.78                        | 12.54                         | 151                           | Na-SO <sub>4</sub> (HCO <sub>3</sub> )     |                    |
| S8  | 8 May 2019       | 76.68 | 270  | -      | -     | 96.7 | 3.58            | 0.19           | 7.85             | 9.04             | 2.98 | 0.12            | 73.32                        | 55.7                          | 35.65                         | Na-HCO <sub>3</sub> (SO <sub>4</sub> )     |                    |
|     | Average          | 75.63 | 280  | 8.17   | 424.5 | 101  | 4.08            | 0.22           | 7.46             | 8.69             | 3.14 | 0.12            | 78.5                         | 34.12                         | 108.8                         |                                            |                    |
|     | 15 March 2015    | 64    | 1510 | 8.03   | 1880  | 215  | 15.4            | 25             | 212              | 4.07             | 34.6 | -               | 852.2                        | -                             | 312.4                         | Ca(Na)-HCO <sub>3</sub> (SO <sub>4</sub> ) |                    |
| S9  | 23 January 2016  | 36.9  | 1530 | 6.88   | 1953  | 217  | 15.2            | 25.7           | 213              | 0.33             | 32.6 | -               | 847.2                        | -                             | 361.9                         | Ca(Na)-HCO <sub>3</sub> (SO <sub>4</sub> ) |                    |
|     | 20 February      | 51.7  | 1820 | 6.87   | 1912  | 253  | 17.5            | 31.8           | 264              | 3.33             | 37.3 | -               | 1038                         | -                             | 344.9                         | Ca(Na)-HCO <sub>3</sub> (SO <sub>4</sub> ) |                    |
|     | 15 March 2018    | 51.43 | 1460 | 6.81   | 1833  | 221  | 15.7            | 25.9           | 153              | 3.5              | 32.5 | -               | 892.8                        | 13.63                         | 197.5                         | Na(Ca)-SO <sub>4</sub>                     |                    |
|     | Average          | 51.01 | 1580 | 7.15   | 1895  | 226  | 16              | 27.1           | 211              | 2.81             | 34.2 | 0               | 907.5                        | 13.63                         | 304.2                         |                                            |                    |

“—” represent no data.

Continued Table S1

| No. | Sampling Time |       | Temp<br>(°C) | TDS<br>(mg/L) | pH   |       | EC<br>μs/cm | (mg/L)          |                |                  |                  |      |                 |                              |                               |                               |                                            | Hydrochemical |
|-----|---------------|-------|--------------|---------------|------|-------|-------------|-----------------|----------------|------------------|------------------|------|-----------------|------------------------------|-------------------------------|-------------------------------|--------------------------------------------|---------------|
|     | (day          | month |              |               |      |       |             | Na <sup>+</sup> | K <sup>+</sup> | Mg <sup>2+</sup> | Ca <sup>2+</sup> | F    | Cl <sup>-</sup> | NO <sub>3</sub> <sup>-</sup> | SO <sub>4</sub> <sup>2-</sup> | CO <sub>3</sub> <sup>2-</sup> | HCO <sub>3</sub> <sup>-</sup>              |               |
| S10 | 15 March      | 2015  | 40           | 550           | 8.03 | 839   | 79.9        | 8.53            | 20             | 104              | 1.87             | 18   | 6.34            | 139.4                        | -                             | 337.1                         | Na(Ca)-SO <sub>4</sub> (HCO <sub>3</sub> ) |               |
|     | 23 January    | 2016  | 28.9         | 540           | 7.49 | 838   | 70.4        | 8.16            | 20.1           | 103              | 0.16             | 15.5 | 10.72           | 125.7                        | -                             | 372.2                         | Na(Ca)-HCO <sub>3</sub>                    |               |
|     | 20 February   | 2017  | 40           | 620           | 7.28 | 862   | 79.4        | 9.06            | 25.3           | 130              | 1.3              | 17.9 | 13.65           | 153.1                        | -                             | 379.1                         | Na(Ca)-SO <sub>4</sub> (HCO <sub>3</sub> ) |               |
|     | 15 March      | 2018  | 39.5         | 350           | 7.35 | 814   | 63.8        | 7.7             | 19.5           | 25.6             | 1.48             | 14.7 | 12.96           | 120                          | 19.8                          | 123.5                         | Na-SO <sub>4</sub> (HCO <sub>3</sub> )     |               |
|     | Average       |       | 37.1         | 510           | 7.54 | 838.3 | 73.4        | 8.36            | 21.2           | 90.7             | 1.2              | 16.5 | 10.92           | 134.5                        | 19.8                          | 303                           |                                            |               |
| S11 | 2016/1/21     |       | 66           | 230           | 8.71 | 387   | 92.4        | 2.83            | 0.22           | 7.35             | 2.13             | 7.89 | -               | 19.02                        | 33.9                          | 137.9                         | Na-HCO <sub>3</sub>                        |               |
| S12 | 17 February   |       | 52.3         | 310           | 7.32 | 480   | 124         | 11.4            | 1.7            | 8.48             | 5.87             | 9.17 | -               | 17.84                        | -                             | 264.2                         | Na-HCO <sub>3</sub>                        |               |
| S13 | 18 February   | 2017  | 47.2         | 1310          | 7.54 | 1333  | 153         | 11.4            | 10             | 209              | 3.42             | 9.7  | 0.35            | 832.4                        | -                             | 170.1                         | Na(Ca)-SO <sub>4</sub>                     |               |
|     | 15 March      | 2018  | 47.8         | 1130          | 7.21 | 1304  | 130         | 9.8             | 7.89           | 170              | 3.9              | 8.24 | -               | 728.3                        | 9.9                           | 125.5                         | Na(Ca)-SO <sub>4</sub>                     |               |
|     | Average       |       | 47.5         | 1220          | 7.38 | 1319  | 141         | 10.6            | 8.96           | 189              | 3.66             | 8.97 | 0.35            | 780.3                        | 9.9                           | 147.8                         |                                            |               |
| S14 | 15 March      | 2015  | 84           | 880           | 8.6  | 1180  | 145         | 16.1            | 4.33           | 115              | 4.98             | 10.3 | -               | 525                          | -                             | 123.7                         | Na(Ca)-SO <sub>4</sub>                     |               |
|     | 22 January    | 2016  | 72           | 880           | 7.6  | 1197  | 145         | 16              | 4.45           | 114              | 0.45             | 10.6 | -               | 508.2                        | -                             | 158.5                         | Na(Ca)-SO <sub>4</sub>                     |               |
|     | 16 February   | 2017  | 73.4         | 900           | 6.93 | 1199  | 147         | 16.3            | 4.27           | 112              | 5.34             | 9.8  | -               | 534                          | -                             | 135.1                         | Na(Ca)-SO <sub>4</sub>                     |               |
|     | 15 March      | 2018  | 73.4         | 930           | 7.14 | 1167  | 144         | 16              | 4.31           | 115              | 4.8              | 9.61 | -               | 543.1                        | 26.4                          | 132.9                         | Na(Ca)-SO <sub>4</sub>                     |               |
|     | 7 May         | 2019  | 77.9         | 910           | -    | -     | 146         | 15.7            | 4.3            | 104              | 5.01             | 9.81 | -               | 556.2                        | 30.94                         | 81.09                         | Na(Ca)-SO <sub>4</sub>                     |               |
|     | Average       |       | 76.14        | 900           | 7.57 | 1186  | 145         | 16              | 4.33           | 112              | 4.11             | 10   | 0               | 533.3                        | 28.67                         | 126.3                         |                                            |               |

“—” represent no data.

Continued Table S1

| Sampling Time |                  | Temp  | TDS    | pH   |       | EC   | Na <sup>+</sup> | K <sup>+</sup> | Mg <sup>2+</sup> | Ca <sup>2+</sup> | F      | Cl <sup>-</sup> | NO <sub>3</sub> <sup>-</sup> | SO <sub>4</sub> <sup>2-</sup> | CO <sub>3</sub> <sup>2-</sup> | HCO <sub>3</sub> <sup>-</sup> | Hydrochemical                          |
|---------------|------------------|-------|--------|------|-------|------|-----------------|----------------|------------------|------------------|--------|-----------------|------------------------------|-------------------------------|-------------------------------|-------------------------------|----------------------------------------|
| No.           | (day month year) | (°C)  | (mg/L) |      | µs/cm |      |                 |                |                  |                  | (mg/L) |                 |                              |                               |                               |                               |                                        |
| S15           | 14 March 2015    | 85    | 810    | 8.63 | 1280  | 210  | 23.6            | 7.68           | 45.7             | 6.07             | 17.6   | -               | 368.8                        | -                             | 259.8                         | -                             | Na-HCO <sub>3</sub> (SO <sub>4</sub> ) |
|               | 22 January 2016  | 82    | 810    | 7.66 | 1220  | 210  | 23.1            | 8.1            | 54.3             | 0.69             | 16.2   | -               | 362                          | -                             | 275.7                         | -                             | Na-HCO <sub>3</sub> (SO <sub>4</sub> ) |
|               | 16February 2017  | 83    | 980    | 7.43 | 1232  | 255  | 28.9            | 9.73           | 56.3             | 7.37             | 19.4   | 0.31            | 476                          | -                             | 258.8                         | -                             | Na-HCO <sub>3</sub> (SO <sub>4</sub> ) |
|               | 14 March 2018    | 90.01 | 840    | 7.45 | 1147  | 213  | 23.9            | 7.91           | 46.6             | 8.51             | 15.1   | 0.23            | 372.3                        | 46.2                          | 214.1                         | -                             | Na-HCO <sub>3</sub> (SO <sub>4</sub> ) |
|               | 7 May 2019       | 92.5  | 750    | -    | -     | 198  | 21.2            | 7.31           | 44               | 9.23             | 12.8   | 0.44            | 316.3                        | 35.07                         | 217.4                         | -                             | Na-HCO <sub>3</sub>                    |
|               | Average          | 86.5  | 840    | 7.79 | 1220  | 217  | 24.1            | 8.14           | 49.4             | 6.37             | 16.2   | 0.33            | 379.1                        | 40.63                         | 0.84                          | -                             |                                        |
| S16           | 21 January 2016  | 79.9  | 970    | 7.75 | 1509  | 366  | 11.1            | 4.12           | 54.4             | 0.3              | 8.49   | -               | 17.68                        | 217                           | 592.8                         | -                             | Na-HCO <sub>3</sub>                    |
|               | 17 February 2016 | 82    | 990    | 6.97 | 1459  | 426  | 12.8            | 4.53           | 20.1             | 3.02             | 9.84   | -               | 15.95                        | -                             | 992.9                         | -                             | Na-HCO <sub>3</sub> (SO <sub>4</sub> ) |
|               | Average          | 80.95 | 980    | 7.36 | 1484  | 396  | 12              | 4.33           | 37.3             | 1.66             | 9.17   | -               | 16.82                        | 217                           | 792.8                         | -                             |                                        |
| S17           | 6 May 2019       | 26.7  | 330    | -    | -     | 2.8  | 1.36            | 23.9           | 93.1             | -                | 2.21   | 3.82            | 4.76                         | 56.38                         | 281                           | -                             | Ca-HCO <sub>3</sub>                    |
| S18           | 14 March 2018    | 50.05 | 170    | 7.11 | 471   | 442  | 1.88            | 27.3           | 18.7             | 0.5              | 0.39   | 1.34            | 5.92                         | 24.42                         | 163.1                         | -                             | Ca(Mg)-HCO <sub>3</sub>                |
| S19           | 7 May 2019       | 38.6  | 300    | -    | -     | 3.76 | 2.35            | 40.6           | 61.2             | 0.77             | 0.29   | 0.67            | 5.87                         | 53.63                         | 255.2                         | -                             | Mg(Ca)-HCO <sub>3</sub>                |
| S20           | 7 May 2019       | 22.3  | 810    | -    | -     | 17.5 | 3.35            | 25.8           | 229              | 0.42             | 300    | 7.32            | 36.2                         | 58.45                         | 260.8                         | -                             | Ca-HCO <sub>3</sub> (Cl)               |

“—” represent no data.

Table S2. Concentrations of trace elements in the water samples from the 20 sites

| No. | Sampling<br>(day month) | µg/L |       |        |       |       |        |      |      |      |      |      |      |      |      |
|-----|-------------------------|------|-------|--------|-------|-------|--------|------|------|------|------|------|------|------|------|
|     |                         | Hg   | As    | Ag     | B     | Li    | Be     | Ti   | V    | Mn   | Cr   | Co   | Ni   | Cu   | Zn   |
| S1  | 22 February             | 0.03 | <1.00 | 0.01   | 67.4  | 66.4  | <0.002 | 1.99 | 0.71 | 6.19 | 2.49 | 0.24 | 3.15 | 2.89 | 26   |
|     | 15 March 2015           | 0.73 | -     | 0.01   | 560   | 173   | 0.34   | 1.77 | 0.36 | 0.92 | 0.9  | 0.03 | 0.25 | 0.28 | 1.8  |
|     | 23 January 2016         | 1.33 | -     | 0.02   | 920   | 244   | 0.4    | 3.36 | 0.31 | 1.38 | 1.77 | 0.11 | 0.58 | 0.85 | 13.6 |
|     | 21 February             | 1.58 | <1.00 | 0.2    | 856   | 226   | 0.51   | 12.5 | 1    | 9.19 | 3.41 | 0.31 | 1.77 | 7.06 | 24.9 |
| S2  | 16 March 2018           | -    | -     | 0.01   | 924   | -     | 0.6    | 16.1 | 0.54 | 4.68 | 1.83 | 0.04 | 0.25 | 0.48 | 4.67 |
|     | 2 May 2019              | -    | 2.19  | 0      | 828   | 245   | 0.53   | 11.4 | 0.64 | 2.4  | 2.83 | 0.02 | 0.47 | 0.76 | 4.96 |
|     | Average                 | 1.21 | 2.19  | 0.05   | 817.6 | 222   | 0.48   | 9.03 | 0.57 | 3.71 | 2.15 | 0.1  | 0.66 | 1.89 | 9.99 |
|     | 21 February             | 0.01 | <1.00 | 0.01   | 193   | 94.7  | 0.04   | 1.7  | 2.04 | 2.8  | 2.33 | 0.21 | 3.85 | 1.25 | 12.5 |
| S3  | 15 March 2015           | 0.01 | -     | 0.01   | 126   | 84.6  | 0.05   | 0.77 | 2.48 | 0.24 | 1.43 | 0.13 | 1.76 | 0.46 | 1.76 |
|     | 23 January 2016         | 0.02 | -     | 0.01   | 211   | 117   | 0.03   | 1.4  | 2.07 | 0.14 | 1.58 | 0.13 | 2.34 | 0.55 | 1.67 |
|     | 21 February             | 0.03 | <1.00 | 0.03   | 240   | 114   | 0.03   | 5.25 | 2.42 | 2.9  | 2.12 | 0.28 | 4.46 | 1.84 | 22.3 |
|     | 16 March 2018           | -    | -     | 0.02   | 226   | -     | 0.03   | 6.19 | 1.7  | 0.85 | 1.85 | 0.24 | 5.2  | 0.63 | 7.19 |
| S4  | Average                 | 0.02 | <1.00 | 0.02   | 200.8 | 105.2 | 0.04   | 3.4  | 2.17 | 1.03 | 1.75 | 0.2  | 3.44 | 0.87 | 8.23 |
|     | 14 March 2018           | -    | -     | <0.002 | 855   | -     | 0.59   | 11.4 | 0.71 | 51.6 | 1.93 | 0.11 | 2.63 | 0.51 | 1.7  |
|     | 6 May 2019              | -    | 2.23  | 0.02   | 707   | 144   | 0.41   | 7.74 | 1.58 | 46.8 | 2.16 | 0.26 | 6.96 | 0.75 | 1.56 |
|     | Average                 | 2.23 | 0.02  | 0.02   | 781   | 144   | 0.5    | 9.57 | 1.15 | 49.2 | 2.05 | 0.19 | 4.8  | 0.63 | 1.63 |
| S5  | 20 February             | 0.02 | <1.00 | 0.01   | 41.4  | 21    | 0.06   | 2.82 | 3.44 | 1.33 | 1.74 | 0.22 | 3.97 | 0.96 | 4.06 |
|     | 16 March 2018           | -    | -     | 0.02   | 43.1  | -     | 0.13   | 13.1 | 3.38 | 1.77 | 2.76 | 0.3  | 6.6  | 0.8  | 3.21 |
|     | Average                 | 0.02 | <1.00 | 0.15   | 42.25 | 21    | 0.1    | 7.96 | 3.41 | 1.55 | 2.25 | 0.26 | 5.29 | 0.88 | 3.64 |
|     | 21 February             | 0.01 | <1.00 | 0.01   | 193   | 94.7  | 0.04   | 1.7  | 2.04 | 2.8  | 2.33 | 0.21 | 3.85 | 1.25 | 12.5 |
| S6  | 15 March 2015           | 0.01 | -     | 0.01   | 126   | 84.6  | 0.05   | 0.77 | 2.48 | 0.24 | 1.43 | 0.13 | 1.76 | 0.46 | 1.76 |
|     | 23 January 2016         | 0.02 | -     | 0.01   | 211   | 117   | 0.03   | 1.4  | 2.07 | 0.14 | 1.58 | 0.13 | 2.34 | 0.55 | 1.67 |
|     | 21 February             | 0.03 | <1.00 | 0.03   | 240   | 114   | 0.03   | 5.25 | 2.42 | 2.9  | 2.12 | 0.28 | 4.46 | 1.84 | 22.3 |
|     | 16 March 2018           | -    | -     | 0.02   | 226   | -     | 0.03   | 6.19 | 1.7  | 0.85 | 1.85 | 0.24 | 5.2  | 0.63 | 7.19 |
| S7  | Average                 | 0.02 | <1.00 | 0.02   | 200.8 | 105.2 | 0.04   | 3.4  | 2.17 | 1.03 | 1.75 | 0.2  | 3.44 | 0.87 | 8.23 |
|     | 14 March 2018           | -    | -     | <0.002 | 855   | -     | 0.59   | 11.4 | 0.71 | 51.6 | 1.93 | 0.11 | 2.63 | 0.51 | 1.7  |
|     | 6 May 2019              | -    | 2.23  | 0.02   | 707   | 144   | 0.41   | 7.74 | 1.58 | 46.8 | 2.16 | 0.26 | 6.96 | 0.75 | 1.56 |
|     | Average                 | 2.23 | 0.02  | 0.02   | 781   | 144   | 0.5    | 9.57 | 1.15 | 49.2 | 2.05 | 0.19 | 4.8  | 0.63 | 1.63 |
| S8  | 20 February             | 0.02 | <1.00 | 0.01   | 41.4  | 21    | 0.06   | 2.82 | 3.44 | 1.33 | 1.74 | 0.22 | 3.97 | 0.96 | 4.06 |
|     | 16 March 2018           | -    | -     | 0.02   | 43.1  | -     | 0.13   | 13.1 | 3.38 | 1.77 | 2.76 | 0.3  | 6.6  | 0.8  | 3.21 |
|     | Average                 | 0.02 | <1.00 | 0.15   | 42.25 | 21    | 0.1    | 7.96 | 3.41 | 1.55 | 2.25 | 0.26 | 5.29 | 0.88 | 3.64 |
|     | 21 February             | 0.01 | <1.00 | 0.01   | 193   | 94.7  | 0.04   | 1.7  | 2.04 | 2.8  | 2.33 | 0.21 | 3.85 | 1.25 | 12.5 |
| S9  | 15 March 2015           | 0.01 | -     | 0.01   | 126   | 84.6  | 0.05   | 0.77 | 2.48 | 0.24 | 1.43 | 0.13 | 1.76 | 0.46 | 1.76 |
|     | 23 January 2016         | 0.02 | -     | 0.01   | 211   | 117   | 0.03   | 1.4  | 2.07 | 0.14 | 1.58 | 0.13 | 2.34 | 0.55 | 1.67 |
|     | 21 February             | 0.03 | <1.00 | 0.03   | 240   | 114   | 0.03   | 5.25 | 2.42 | 2.9  | 2.12 | 0.28 | 4.46 | 1.84 | 22.3 |
|     | 16 March 2018           | -    | -     | 0.02   | 226   | -     | 0.03   | 6.19 | 1.7  | 0.85 | 1.85 | 0.24 | 5.2  | 0.63 | 7.19 |
| S10 | Average                 | 0.02 | <1.00 | 0.02   | 200.8 | 105.2 | 0.04   | 3.4  | 2.17 | 1.03 | 1.75 | 0.2  | 3.44 | 0.87 | 8.23 |
|     | 14 March 2018           | -    | -     | <0.002 | 855   | -     | 0.59   | 11.4 | 0.71 | 51.6 | 1.93 | 0.11 | 2.63 | 0.51 | 1.7  |
|     | 6 May 2019              | -    | 2.23  | 0.02   | 707   | 144   | 0.41   | 7.74 | 1.58 | 46.8 | 2.16 | 0.26 | 6.96 | 0.75 | 1.56 |
|     | Average                 | 2.23 | 0.02  | 0.02   | 781   | 144   | 0.5    | 9.57 | 1.15 | 49.2 | 2.05 | 0.19 | 4.8  | 0.63 | 1.63 |
| S11 | 20 February             | 0.02 | <1.00 | 0.01   | 41.4  | 21    | 0.06   | 2.82 | 3.44 | 1.33 | 1.74 | 0.22 | 3.97 | 0.96 | 4.06 |
|     | 16 March 2018           | -    | -     | 0.02   | 43.1  | -     | 0.13   | 13.1 | 3.38 | 1.77 | 2.76 | 0.3  | 6.6  | 0.8  | 3.21 |
|     | Average                 | 0.02 | <1.00 | 0.15   | 42.25 | 21    | 0.1    | 7.96 | 3.41 | 1.55 | 2.25 | 0.26 | 5.29 | 0.88 | 3.64 |
|     | 21 February             | 0.01 | <1.00 | 0.01   | 193   | 94.7  | 0.04   | 1.7  | 2.04 | 2.8  | 2.33 | 0.21 | 3.85 | 1.25 | 12.5 |
| S12 | 15 March 2015           | 0.01 | -     | 0.01   | 126   | 84.6  | 0.05   | 0.77 | 2.48 | 0.24 | 1.43 | 0.13 | 1.76 | 0.46 | 1.76 |
|     | 23 January 2016         | 0.02 | -     | 0.01   | 211   | 117   | 0.03   | 1.4  | 2.07 | 0.14 | 1.58 | 0.13 | 2.34 | 0.55 | 1.67 |
|     | 21 February             | 0.03 | <1.00 | 0.03   | 240   | 114   | 0.03   | 5.25 | 2.42 | 2.9  | 2.12 | 0.28 | 4.46 | 1.84 | 22.3 |
|     | 16 March 2018           | -    | -     | 0.02   | 226   | -     | 0.03   | 6.19 | 1.7  | 0.85 | 1.85 | 0.24 | 5.2  | 0.63 | 7.19 |
| S13 | Average                 | 0.02 | <1.00 | 0.02   | 200.8 | 105.2 | 0.04   | 3.4  | 2.17 | 1.03 | 1.75 | 0.2  | 3.44 | 0.87 | 8.23 |
|     | 14 March 2018           | -    | -     | <0.002 | 855   | -     | 0.59   | 11.4 | 0.71 | 51.6 | 1.93 | 0.11 | 2.63 | 0.51 | 1.7  |
|     | 6 May 2019              | -    | 2.23  | 0.02   | 707   | 144   | 0.41   | 7.74 | 1.58 | 46.8 | 2.16 | 0.26 | 6.96 | 0.75 | 1.56 |
|     | Average                 | 2.23 | 0.02  | 0.02   | 781   | 144   | 0.5    | 9.57 | 1.15 | 49.2 | 2.05 | 0.19 | 4.8  | 0.63 | 1.63 |
| S14 | 20 February             | 0.02 | <1.00 | 0.01   | 41.4  | 21    | 0.06   | 2.82 | 3.44 | 1.33 | 1.74 | 0.22 | 3.97 | 0.96 | 4.06 |
|     | 16 March 2018           | -    | -     | 0.02   | 43.1  | -     | 0.13   | 13.1 | 3.38 | 1.77 | 2.76 | 0.3  | 6.6  | 0.8  | 3.21 |
|     | Average                 | 0.02 | <1.00 | 0.15   | 42.25 | 21    | 0.1    | 7.96 | 3.41 | 1.55 | 2.25 | 0.26 | 5.29 | 0.88 | 3.64 |
|     | 21 February             | 0.01 | <1.00 | 0.01   | 193   | 94.7  | 0.04   | 1.7  | 2.04 | 2.8  | 2.33 | 0.21 | 3.85 | 1.25 | 12.5 |
| S15 | 15 March 2015           | 0.01 | -     | 0.01   | 126   | 84.6  | 0.05   | 0.77 | 2.48 | 0.24 | 1.43 | 0.13 | 1.76 | 0.46 | 1.76 |
|     | 23 January 2016         | 0.02 | -     | 0.01   | 211   | 117   | 0.03   | 1.4  | 2.07 | 0.14 | 1.58 | 0.13 | 2.34 | 0.55 | 1.67 |
|     | 21 February             | 0.03 | <1.00 | 0.03   | 240   | 114   | 0.03   | 5.25 | 2.42 | 2.9  | 2.12 | 0.28 | 4.46 | 1.84 | 22.3 |
|     | 16 March 2018           | -    | -     | 0.02   | 226   | -     | 0.03   | 6.19 | 1.7  | 0.85 | 1.85 | 0.24 | 5.2  | 0.63 | 7.19 |
| S16 | Average                 | 0.02 | <1.00 | 0.02   | 200.8 | 105.2 | 0.04   | 3.4  | 2.17 | 1.03 | 1.75 | 0.2  | 3.44 | 0.87 | 8.23 |
|     | 14 March 2018           | -    | -     | <0.002 | 855   | -     | 0.59   | 11.4 | 0.71 | 51.6 | 1.93 | 0.11 | 2.63 | 0.51 | 1.7  |
|     | 6 May 2019              | -    | 2.23  | 0.02   | 707   | 144   | 0.41   | 7.74 | 1.58 | 46.8 | 2.16 | 0.26 | 6.96 | 0.75 | 1.56 |
|     | Average                 | 2.23 | 0.02  | 0.02   | 781   | 144   | 0.5    | 9.57 | 1.15 | 49.2 | 2.05 | 0.19 | 4.8  | 0.63 | 1.63 |
| S17 | 20 February             | 0.02 | <1.00 | 0.01   | 41.4  | 21    | 0.06   | 2.82 | 3.44 | 1.33 | 1.74 | 0.22 | 3.97 | 0.96 | 4.06 |
|     | 16 March 2018           | -    | -     | 0.02   | 43.1  | -     | 0.13   | 13.1 | 3.38 | 1.77 | 2.76 | 0.3  | 6.6  | 0.8  | 3.21 |
|     | Average                 | 0.02 | <1.00 | 0.15   | 42.25 | 21    | 0.1    | 7.96 | 3.41 | 1.55 | 2.25 | 0.26 | 5.29 | 0.88 | 3.64 |
|     | 21 February             | 0.01 | <1.00 | 0.01   | 193   | 94.7  | 0.04   | 1.7  | 2.04 | 2.8  | 2.33 | 0.21 | 3.85 | 1.25 | 12.5 |
| S18 | 15 March 2015           | 0.01 | -     | 0.01   | 126   | 84.6  | 0.05   | 0.77 | 2.48 | 0.24 | 1.43 | 0.13 | 1.76 | 0.46 | 1.76 |
|     | 23 January 2016         | 0.02 | -     | 0.01   | 211   | 117   | 0.03   | 1.4  | 2.07 | 0.14 | 1.58 | 0.13 | 2.34 | 0.55 | 1.67 |
|     | 21 February             | 0.03 | <1.00 | 0.03   | 240   | 114   | 0.03   | 5.25 | 2.42 | 2.9  | 2.12 | 0.28 | 4.46 | 1.84 | 22.3 |
|     | 16 March 2018           | -    | -     | 0.02   | 226   | -     | 0.03   | 6.19 | 1.7  | 0.85 | 1.85 | 0.24 | 5.2  | 0.63 | 7.19 |
| S19 | Average                 | 0.02 | <1.00 | 0.02   | 200.8 | 105.2 | 0.04   | 3.4  | 2.17 | 1.03 | 1.75 | 0.2  | 3.44 | 0.87 | 8.23 |
|     | 14 March 2018           | -    | -     | <0.002 | 855   | -     | 0.59   | 11.4 | 0.71 | 51.6 | 1.93 | 0.11 | 2.63 | 0.51 | 1.7  |
|     | 6 May 2019              | -    | 2.23  | 0.02   | 707   | 144   | 0.41   | 7.74 | 1.58 | 46.8 | 2.16 | 0.26 | 6.96 | 0.75 | 1.56 |
|     | Average                 | 2.23 | 0.02  | 0.02   | 781   | 144   | 0.5    | 9.57 | 1.15 | 49.2 | 2.05 | 0.19 | 4.8  | 0.63 | 1.63 |
| S20 | 20 February             | 0.02 | <1.00 | 0.01   | 41.4  | 21    | 0.06   | 2.82 | 3.44 | 1.33 | 1.74 | 0.22 | 3.97 | 0.96 | 4.06 |
|     | 16 March 2018           | -    | -     | 0.02   | 43.1  | -     | 0.13   | 13.1 | 3.38 | 1.77 | 2.76 | 0.3  | 6.6  | 0.8  | 3.21 |
|     | Average                 | 0.0. |       |        |       |       |        |      |      |      |      |      |      |      |      |

Continued Table S2

| No. | Sampling        | Mo   | Cd   | Sb   | Ba    | Tl     | Pb   | Th     | U    | Sr    | Sn   | Fe    | Al    | Se  |
|-----|-----------------|------|------|------|-------|--------|------|--------|------|-------|------|-------|-------|-----|
|     | (day month)     | µg/L |      |      |       |        |      |        |      |       |      |       |       |     |
| S1  | 22 February     | 0.57 | 0.01 | 0.38 | 450   | 0.15   | 3.96 | 0.01   | 0.54 | 323   | 0.09 | 1361  | 32.2  | -   |
|     | 15 March 2015   | 0.23 | 0.01 | 2.78 | 1.93  | 0.11   | 2.46 | 0.01   | 0    | 88.2  | 0.02 | 41    | 108   | -   |
|     | 23 January 2016 | 0.47 | 0.01 | 1.88 | 70.3  | 0.15   | 9.54 | 0.01   | 0.03 | 146   | 0.74 | 136   | 59.9  | -   |
|     | 21 February     | 1.11 | 0.02 | 1.6  | 19.6  | 0.14   | 25.6 | 0.04   | 0.03 | 156   | 0.38 | 408   | 295   | -   |
|     | 16 March 2018   | 0.32 | 0.01 | 1.37 | 2.31  | 0.1    | 0.38 | 0.04   | 0.01 | 141   | 0.05 | 610   | 111   | -   |
| S2  | 2 May 2019      | 0.37 | 0.01 | 1.42 | 3.05  | 0.1    | 0.16 | 0      | 0    | 143   | 0.11 | 39.3  | 45.9  | 0.1 |
|     | Average         | 0.5  | 0.01 | 1.81 | 19.44 | 0.12   | 7.63 | 0.03   | 0.02 | 134.8 | 0.26 | 246.9 | 124   | 0.1 |
|     | 21 February     | 0.42 | 0.01 | 0.26 | 268   | 0.38   | 3.32 | 0      | 0.53 | 1014  | 0.08 | 326   | 27.5  | -   |
| S3  | 15 March 2015   | 0.35 | 0.01 | 0.09 | 244   | <0.002 | 1.2  | <0.002 | 0.46 | 631   | 0.03 | 171   | 23.6  | -   |
|     | 23 January 2016 | 0.37 | 0.01 | 0.05 | 290   | 0.48   | 2.9  | <0.002 | 0.69 | 1183  | 0.04 | 174   | 9.97  | -   |
|     | 21 February     | 0.59 | 0.01 | 0.1  | 277   | 0.46   | 8.41 | 0      | 0.66 | 1226  | 0.03 | 302   | 47.2  | -   |
| S4  | 16 March 2018   | 0.43 | 0.01 | 0.04 | 304   | 0.48   | 0.15 | <0.002 | 0.66 | 1311  | 0.02 | 78.1  | 3.73  | -   |
|     | Average         | 0.44 | 0.01 | 0.07 | 278.8 | 0.36   | 3.17 | <0.002 | 0.62 | 1088  | 0.03 | 181.3 | 21.13 | -   |
|     | 14 March 2018   | 0.03 | 0.01 | 0.66 | 866   | 0.14   | 0.07 | 0      | 0.02 | 1713  | 0.02 | 13.2  | 5.54  | -   |
| S5  | 6 May 2019      | 0.02 | 0    | 0.61 | 864   | 0.15   | 0.21 | <0.002 | 0.02 | 1525  | 0.06 | 107   | 3.48  | -   |
|     | Average         | 0.03 | 0.01 | 0.64 | 865   | 0.15   | 0.14 | <0.002 | 0.02 | 1619  | 0.04 | 60.1  | 4.51  | -   |
|     | 20 February     | 0.86 | 0.03 | 0.03 | 38.2  | 0.07   | 2.17 | 0      | 1.98 | 819   | 0.02 | 237   | 20.2  | -   |
| S6  | 16 March 2018   | 0.9  | 0.03 | 0.01 | 40.1  | 0.07   | 0.08 | 0      | 1.76 | 878   | 0.02 | 340   | 24.3  | -   |
|     | Average         | 0.88 | 0.03 | 0.02 | 39.15 | 0.07   | 1.13 | 0      | 1.87 | 848.5 | 0.02 | 288.5 | 22.25 | -   |

“—” represent no data.

Continued Table S2

| No. | Sampling<br>Time<br>(day month<br>year) | µg/L |       |        |       |       |      |       |      |       |      |      |      |      |      |
|-----|-----------------------------------------|------|-------|--------|-------|-------|------|-------|------|-------|------|------|------|------|------|
|     |                                         | Hg   | As    | Ag     | B     | Li    | Be   | Ti    | V    | Mn    | Cr   | Co   | Ni   | Cu   | Zn   |
| S7  | 16 March 2015                           | -    | -     | 0.01   | 57.5  | -     | 0.07 | 10.9  | 6.14 | 2.08  | 2.22 | 0.23 | 5.64 | 1.75 | 6.41 |
|     | 19 February 2017                        | 0.76 | <1.00 | 0.01   | 111   | 196   | 0.31 | 3.47  | 0.33 | 2.47  | 0.64 | 0.02 | 0.44 | 3.15 | 3.55 |
|     | 15 March 2018                           | -    | -     | <0.002 | 119   | -     | 0.47 | 18    | 0.2  | 7.51  | 1.07 | 0.01 | 0.19 | 1.06 | 2.21 |
|     | 8 May 2019                              | -    | 0.39  | <0.002 | 132   | 243   | 0.39 | 10.9  | 0.45 | 7.34  | 1.4  | 0.02 | 0.47 | 0.87 | 2.47 |
|     | Average                                 | 0.76 | 0.39  | 0.01   | 120.7 | 219.5 | 0.39 | 10.79 | 0.33 | 5.77  | 1.04 | 0.02 | 0.37 | 1.69 | 2.74 |
| S8  | 15 March 2015                           | 0.14 | -     | 0      | 245   | 159   | 0.24 | 1.43  | 1.3  | 8.95  | 0.61 | 0.34 | 4.83 | 1.81 | 1.81 |
|     | 23 January 2016                         | 0.28 | -     | 0.01   | 437   | 215   | 0.35 | 4.84  | 0.77 | 75.9  | 1.15 | 0.25 | 4.17 | 3.49 | 7.77 |
|     | 20 February 2017                        | 0.33 | <1.00 | 0      | 408   | 209   | 0.56 | 4.21  | 1.26 | 93.9  | 0.98 | 0.28 | 3.6  | 3.53 | 8    |
|     | 15 March 2015                           | -    | -     | 0      | 428   |       | 0.69 | 16.4  | 1.06 | 94.1  | 1.28 | 0.35 | 7.8  | 4.16 | 2.97 |
|     | Average                                 | 0.25 | <1.00 | 0      | 379.5 | 145.8 | 0.46 | 6.72  | 1.1  | 68.21 | 1.01 | 0.31 | 5.1  | 3.25 | 5.14 |
| S9  | 15 March 2015                           | 0.06 | -     | 0.01   | 123   | 47.4  | 0.05 | 11.3  | 6.47 | 0.33  | 1.01 | 0.16 | 2.79 | 0.55 | 2.02 |
|     | 20 February 2017                        | 0.04 | <1.00 | 0.01   | 166   | 51.2  | 0.08 | 2.97  | 7.57 | 0.63  | 2.04 | 0.14 | 2.13 | 0.95 | 3.21 |
|     | 15 March 2018                           | -    | -     | 0.01   | 161   | -     | 0.13 | 11.3  | 6.76 | 0.88  | 2.06 | 0.17 | 3.7  | 1.29 | 1.86 |
|     | Average                                 | 0.05 | <1.00 | 0.01   | 150   | 49.3  | 0.09 | 8.52  | 6.93 | 0.61  | 1.7  | 0.16 | 2.87 | 0.93 | 2.36 |
|     | 17 February 2017                        | 0.38 | 1.95  | 0      | 331   | 85.6  | 0.29 | 3.09  | 0.44 | 20.5  | 0.77 | 0.03 | 0.72 | 0.26 | 3.01 |

“—” represent no data.

Continued Table S2

| No. | Sampling Time    |      | µg/L |      |       |      |      |        |      |       |      |       |        |      |    |
|-----|------------------|------|------|------|-------|------|------|--------|------|-------|------|-------|--------|------|----|
|     | (day month year) |      | Mo   | Cd   | Sb    | Ba   | Tl   | Pb     | Th   | U     | Sr   | Sn    | Fe     | Al   | Se |
| S7  | 16 March 2018    | 1.25 | 0.01 | 0.03 | 48.9  | 0.05 | 0.1  | <0.002 | 1.49 | 688   | 0.03 | 241   | 18.5   | -    |    |
|     | 19 February 2017 | 1.55 | 0.01 | 0.23 | 1.98  | 0.06 | 0.77 | 0      | 0.02 | 117   | 0.04 | 63.8  | 48.5   | -    |    |
|     | 15 March 2018    | 1.35 | 0.01 | 0.06 | 1.6   | 0.03 | 0.01 | 0      | 0    | 112   | 0.02 | 87.3  | 27.8   | -    |    |
|     | 8 May 2019       | 1.39 | 0    | 0.15 | 2.12  | 0.03 | 0.06 | 0      | 0    | 102   | 0.07 | 28.3  | 22.3   | 0.12 |    |
|     | Average          | 1.43 | 0.01 | 0.15 | 1.9   | 0.04 | 0.28 | 0      | 0.02 | 110.3 | 0.04 | 59.8  | 32.87  | 0.12 |    |
| S8  | 15 March 2015    | 1.16 | 0.01 | 0.03 | 22.3  | 0.03 | 0.44 | 0.01   | 0.16 | 1202  | 0.01 | 358   | <0.002 | -    |    |
|     | 23 January 2016  | 1.62 | 0.01 | 0.03 | 31.4  | 0.04 | 1.37 | 0.01   | 0.22 | 2294  | 0.03 | 318   | 6.66   | -    |    |
|     | 20 February 2017 | 1.51 | 0    | 0.03 | 29.9  | 0.04 | 5.41 | 0.06   | 0.24 | 2283  | 0.09 | 331   | 6.14   | -    |    |
|     | 15 March 2018    | 1.42 | 0    | 0.01 | 27.1  | 0.03 | 0.02 | 0      | 0.21 | 2513  | 0.02 | 7299  | 4.7    | -    |    |
|     | Average          | 1.43 | 0.01 | 0.03 | 27.68 | 0.04 | 1.81 | 0.03   | 0.21 | 2073  | 0.04 | 2077  | 4.38   | -    |    |
| S9  | 15 March 2015    | 2.16 | 0.02 | 8.59 | 43.1  | 0.16 | 2.57 | <0.002 | 1.25 | 705   | 1.92 | 199   | 8.92   | -    |    |
|     | 20 February 2017 | 2.42 | 0.01 | 0.85 | 50.3  | 0.13 | 0.24 | 0      | 1.51 | 1124  | 0.01 | 276   | 11     | -    |    |
|     | 15 March 2018    | 2.1  | 0.02 | 0.04 | 43.3  | 0.12 | 0.02 | <0.002 | 1.39 | 1161  | 0.01 | 43.4  | 6.69   | -    |    |
|     | Average          | 2.23 | 0.02 | 3.16 | 45.57 | 0.14 | 0.94 | <0.002 | 1.38 | 996.7 | 0.65 | 172.8 | 8.87   | -    |    |
|     | 17 February 2017 | 1.15 | 0.01 | 6.14 | 12.9  | 0.03 | 2.35 | 0.01   | 0.01 | 233   | 0.04 | 138   | 35.1   | -    |    |

“—” represent no data.



Continued Table S2

| No. | Sampling      | Hg   | As    | Ag     | B     | Li    | Be   | Ti    | V    | Mn    | Cr   | Co   | Ni   | Cu   | Zn   |
|-----|---------------|------|-------|--------|-------|-------|------|-------|------|-------|------|------|------|------|------|
|     | (day month)   | µg/L |       |        |       |       |      |       |      |       |      |      |      |      |      |
| S13 | 18 February   | 0.2  | <1.00 | 0.01   | 85.5  | 64.9  | 0.05 | 5.12  | 0.56 | 1.32  | 0.76 | 0.22 | 2.45 | 5.9  | 4.75 |
|     | 15 March 2018 | -    | -     | 0.01   | 88.2  | -     | 0.16 | 19.9  | 0.39 | 81.2  | 1.23 | 0.26 | 6.55 | 3.57 | 4.95 |
|     | Average       | 0.2  | <1.00 | 0.01   | 86.85 | 64.9  | 0.11 | 12.51 | 0.48 | 41.26 | 1    | 0.24 | 4.5  | 4.74 | 4.85 |
| S14 | 14 March 2015 | 0.08 | -     | 0      | 163   | 91.6  | 0.27 | 2.99  | 0.39 | 0.73  | 0.43 | 0.2  | 3.05 | 1.38 | 4.81 |
|     | 16 February   | 0.14 | <1.00 | 0.01   | 219   | 102   | 0.34 | 5.93  | 0.41 | 37    | 0.98 | 0.15 | 1.75 | 1.86 | 4.66 |
|     | 15 March 2018 | -    | -     | 0      | 244   |       | 0.49 | 27.2  | 0.36 | 38.8  | 1.19 | 0.18 | 4.42 | 3.23 | 3.43 |
| S15 | 7 May 2019    | -    | 1.36  | 0.01   | 241   | 133   | 0.3  | 15.9  | 0.86 | 32.1  | 0.95 | 0.45 | 11.1 | 2.03 | 0.97 |
|     | Average       | 0.11 | 1.36  | 0.01   | 216.8 | 108.9 | 0.35 | 13.01 | 0.51 | 27.16 | 0.89 | 0.25 | 5.08 | 2.13 | 3.47 |
|     | 14 March 2015 | 0.11 | -     | 0      | 241   | 176   | 1.08 | 3.57  | 0.5  | 42.4  | 0.19 | 0.06 | 1.81 | 0.69 | 3.42 |
| S16 | 16 February   | 0.19 | 9.13  | 0.01   | 346   | 182   | 1.25 | 5.59  | 0.69 | 57.5  | 1.26 | 0.09 | 1.32 | 4.18 | 7.46 |
|     | 14 March 2018 | -    | -     | <0.002 | 367   | -     | 1.77 | 26.3  | 0.48 | 54.6  | 1.43 | 0.08 | 1.5  | 1.86 | 4.96 |
|     | 7 May 2019    | -    | 11.1  | 0.01   | 273   | 203   | 1.36 | 17.1  | 1.92 | 42.1  | 1.71 | 0.16 | 3.91 | 1.2  | 1.49 |
| S17 | Average       | 0.15 | 10.12 | 0.01   | 306.8 | 187   | 1.37 | 13.14 | 0.9  | 49.15 | 1.15 | 0.1  | 2.14 | 1.98 | 4.33 |
|     | 17 February   | 0.47 | <1.00 | 0.08   | 4468  | 870   | 0.22 | 5.1   | 0.7  | 61.8  | 1.05 | 0.02 | 0.68 | 2.35 | 8.39 |
|     | 6 May 2019    | -    | 2.06  | 0.01   | 13.9  | 3.66  | 0.01 | 1.91  | 0.93 | 0.79  | 2.98 | 0.45 | 9.8  | 0.5  | 5.23 |
| S18 | 14 March 2018 | -    | -     | 0      | 77.1  | -     | 0    | 4.86  | 4.33 | 0.83  | 1.88 | 0.13 | 2.88 | 0.53 | 4.15 |
|     | 7 May 2019    | -    | 2.27  | 0      | 7.74  | 4.03  | 0.03 | 2.21  | 1.94 | 0.8   | 2.12 | 0.25 | 5.83 | 0.63 | 6.36 |
|     | 7 May 2019    | -    | 8.9   | 0.02   | 2.12  | 3.62  | 0.01 | 2.07  | 7.31 | 1.58  | 2.56 | 1.04 | 24.2 | 2.96 | 76.5 |

“—” represent no data.

Continued Table S2

| No.  | Sampling<br>(day month) | Mo   | Cd     | Sb   | Ba   | Tl   | Pb   | Th     | U      | Sr    | Sn   | Fe    | Al    | Se   |
|------|-------------------------|------|--------|------|------|------|------|--------|--------|-------|------|-------|-------|------|
| µg/L |                         |      |        |      |      |      |      |        |        |       |      |       |       |      |
| S13  | 18 February             | 1.11 | 0.01   | 3.05 | 32.9 | 0.07 | 1.13 | 0      | 0.01   | 3379  | 0.05 | 312   | 11.6  | -    |
|      | Average                 | 0.99 | 0.01   | 0.03 | 33.1 | 0.06 | 0.02 | 0      | <0.002 | 3688  | 0.02 | 4093  | 4.47  | -    |
|      | Average                 | 1.05 | 0.01   | 1.54 | 33   | 0.07 | 0.58 | 0      | 0.01   | 3534  | 0.04 | 2203  | 8.04  | 0    |
| S14  | 14 March 2015           | 0.05 | <0.002 | 0.75 | 48   | 0.13 | 0.77 | 0.04   | 0      | 1734  | 0.04 | 269   | 16.8  | -    |
|      | 16 February             | 0.04 | <0.002 | 1.87 | 51.7 | 0.18 | 3.17 | 0.02   | 0      | 3291  | 0.03 | 227   | 29.7  | -    |
|      | Average                 | 0.02 | 0      | 0.06 | 58   | 0.12 | 0.03 | 0      | <0.002 | 3386  | 0.02 | 83.1  | 7.55  | -    |
| S15  | 7 May 2019              | 0.01 | 0.01   | 0.03 | 48.7 | 0.14 | 0.05 | <0.002 | <0.002 | 3028  | 0.02 | 174   | 3.54  | 0.12 |
|      | Average                 | 0.03 | 0.01   | 0.68 | 51.6 | 0.14 | 1.01 | 0.03   | <0.002 | 2860  | 0.03 | 188.3 | 14.4  | 0.12 |
|      | Average                 | 0.03 | 0.01   | 0.68 | 51.6 | 0.14 | 1.01 | 0.03   | <0.002 | 2860  | 0.03 | 188.3 | 14.4  | 0.12 |
| S16  | 14 March 2015           | 0.03 | 0      | 1.5  | 30.5 | 0.19 | 1    | 0.02   | 0      | 491   | 0.01 | 170   | 23.6  | -    |
|      | 16 February             | 0.21 | 0      | 1.2  | 34   | 0.25 | 1.04 | 0      | 0.01   | 934   | 0.05 | 130   | 9.62  | -    |
|      | Average                 | 0.08 | 0.01   | 0.84 | 33.3 | 0.19 | 0.03 | 0.01   | <0.002 | 952   | 0.02 | 129   | 22    | -    |
| S17  | 7 May 2019              | 0.08 | 0      | 0.96 | 31   | 0.17 | 0.12 | 0      | 0      | 764   | 0.02 | 76.1  | 10.4  | 0.11 |
|      | Average                 | 0.1  | 0.01   | 1.13 | 32.2 | 0.2  | 0.55 | 0.02   | 0.01   | 785.3 | 0.03 | 126.3 | 16.41 | 0.11 |
|      | Average                 | 0.04 | 0      | 2.34 | 3016 | 0.01 | 1.67 | 0      | 0.01   | 611   | 0.03 | 84    | 48.8  | -    |
| S18  | 6 May 2019              | 0.21 | 0.03   | 0.15 | 23.3 | 0.05 | 0.09 | <0.002 | 0.48   | 73.5  | 0.02 | 140   | 14.2  | 0.11 |
|      | 14 March 2018           | 2.39 | 0.01   | 0.79 | 37   | 0.18 | 0.09 | <0.002 | 2.8    | 345   | 0.02 | 170   | 7.92  | -    |
|      | Average                 | 3.15 | 0.02   | 0.14 | 52.3 | 0.17 | 0.12 | <0.002 | 7.78   | 126   | 0.02 | 87.2  | 6.95  | 0.1  |
| S19  | 7 May 2019              | 0.1  | 0.01   | 0.01 | 84   | 0.01 | 1    | 0      | 1.05   | 1189  | 0.08 | 664   | 4.72  | 0.11 |
|      | Average                 | 0.1  | 0.01   | 0.01 | 84   | 0.01 | 1    | 0      | 1.05   | 1189  | 0.08 | 664   | 4.72  | 0.11 |
|      | Average                 | 0.1  | 0.01   | 0.01 | 84   | 0.01 | 1    | 0      | 1.05   | 1189  | 0.08 | 664   | 4.72  | 0.11 |

"—" represent no data.

Table S3 Z score normalization of ion concentrations were calculated for comparing with the geochemical background of different springs

| Sampling Time<br>(day month<br>year) | Na <sup>+</sup> | K <sup>+</sup> | Mg <sup>2+</sup> | Ca <sup>2+</sup> | F <sup>-</sup> | Cl <sup>-</sup> | NO <sub>3</sub> <sup>-</sup> | SO <sub>4</sub> <sup>2-</sup> | CO <sub>3</sub> <sup>2-</sup> | HCO <sub>3</sub> <sup>-</sup> |
|--------------------------------------|-----------------|----------------|------------------|------------------|----------------|-----------------|------------------------------|-------------------------------|-------------------------------|-------------------------------|
| 15 March 2015                        | 0.00            | 0.54           | -1.22            | 0.25             | -0.18          | -0.77           | -                            | 0.68                          | -                             | -1.34                         |
| 15 March 2015                        | 1.24            | 1.72           | -0.94            | -0.83            | 0.05           | -0.39           | -                            | 0.17                          | -                             | -0.41                         |
| 15 March 2015                        | -0.32           | -1.12          | -                | -1.47            | 2.12           | -0.96           | -                            | -1.02                         | -                             | -0.30                         |
| 15 March 2015                        | -1.01           | -0.95          | 1.53             | 0.22             | -0.80          | 1.99            | -                            | -1.00                         | -                             | 1.98                          |
| 15 March 2015                        | 1.34            | 0.44           | 0.52             | 1.74             | -0.37          | 0.49            | -                            | 1.76                          | -                             | -0.05                         |
| 15 March 2015                        | -1.24           | -0.64          | 0.10             | 0.08             | -0.82          | -0.37           | -                            | -0.59                         | -                             | 0.12                          |
| 21 January 2016                      | -0.83           | -1.37          | -0.94            | -1.19            | 2.11           | -0.66           | -                            | -0.76                         | -0.61                         | -1.21                         |
| 21 January 2016                      | 2.21            | -0.02          | -0.65            | -0.46            | -0.59          | -0.63           | -                            | -0.77                         | 1.41                          | 1.31                          |
| 22 January 2016                      | -0.25           | 0.77           | -0.63            | 0.46             | -0.37          | -0.52           | -                            | 0.93                          | -                             | -1.10                         |
| 22 January 2016                      | 0.48            | 1.94           | -0.36            | -0.47            | -0.02          | -0.23           | -                            | 0.43                          | -                             | -0.45                         |
| 23 January 2016                      | -0.32           | -0.76          | -0.93            | -1.22            | 1.13           | -0.73           | -                            | -0.79                         | -0.80                         | -0.47                         |
| 23 January 2016                      | -0.76           | -0.70          | 2.04             | 0.60             | -0.91          | 2.42            | -1.00                        | -0.76                         | -                             | 1.79                          |
| 23 January 2016                      | 0.55            | 0.65           | 0.94             | 2.00             | -0.55          | 0.63            | -                            | 2.11                          | -                             | 0.03                          |
| 23 January 2016                      | -1.08           | -0.50          | 0.53             | 0.29             | -0.80          | -0.27           | 1.00                         | -0.39                         | -                             | 0.09                          |
| 16 February 2017                     | -0.05           | 0.79           | -0.89            | 0.16             | 0.08           | -0.61           | -                            | 0.83                          | -                             | -1.13                         |
| 16 February 2017                     | 1.01            | 2.75           | -0.53            | -0.55            | 0.61           | -0.14           | -0.84                        | 0.65                          | -                             | -0.61                         |

“–” represent no data.

Continued Table S3

| Sampling Time<br>(day month<br>year) | Na <sup>+</sup> | K <sup>+</sup> | Mg <sup>2+</sup> | Ca <sup>2+</sup> | F <sup>-</sup> | Cl <sup>-</sup> | NO <sub>3</sub> <sup>-</sup> | SO <sub>4</sub> <sup>2-</sup> | CO <sub>3</sub> <sup>2-</sup> | HCO <sub>3</sub> <sup>-</sup> |
|--------------------------------------|-----------------|----------------|------------------|------------------|----------------|-----------------|------------------------------|-------------------------------|-------------------------------|-------------------------------|
| 17 February<br>2017                  | -0.28           | 0.04           | -1.05            | -1.17            | 0.22           | -0.65           | -                            | -0.71                         | -                             | -0.58                         |
| 17 February<br>2017                  | 2.69            | 0.26           | -0.87            | -1.02            | -0.52          | -0.61           | -                            | -0.71                         | -                             | 2.49                          |
| 18 February<br>2017                  | 0.01            | 0.04           | -0.52            | 1.41             | -0.42          | -0.62           | -0.83                        | 1.71                          | -                             | -0.98                         |
| 20 February<br>2017                  | -0.41           | -1.06          | -1.14            | -1.18            | 0.93           | -0.92           | -                            | -0.48                         | -                             | -1.11                         |
| 20 February<br>2017                  | -1.00           | -0.65          | 0.81             | 0.77             | -1.03          | -0.15           | 0.03                         | -0.43                         | -                             | 0.71                          |
| 20 February<br>2017                  | 0.99            | 0.99           | 0.89             | 2.12             | -0.44          | 0.76            | -                            | 2.32                          | -                             | -0.24                         |
| 20 February<br>2017                  | -0.71           | -0.33          | 0.47             | 0.40             | -0.97          | -0.21           | 2.31                         | -0.30                         | -                             | -0.10                         |
| 20 February<br>2017                  | 0.02            | -0.55          | -1.15            | -1.21            | 2.90           | -0.75           | -                            | -0.72                         | -                             | -0.43                         |
| 21 February<br>2017                  | -0.54           | -0.64          | 1.55             | 0.16             | -0.48          | 2.04            | -0.49                        | -0.71                         | -                             | 0.88                          |
| 21 February<br>2017                  | -0.48           | -0.61          | 1.50             | 0.30             | -0.51          | 2.25            | -0.20                        | -0.71                         | -                             | 1.05                          |
| 22 February<br>2017                  | -1.22           | -1.01          | 0.92             | -0.20            | -0.37          | -0.38           | 0.02                         | -0.74                         | -                             | 0.06                          |
| 14 March 2018                        | 0.40            | 0.12           | -0.10            | 0.21             | 0.10           | 0.41            | -                            | -0.78                         | 2.59                          | 2.69                          |
| 14 March 2018                        | 1.63            | 2.43           | -0.74            | -0.15            | 0.88           | -0.16           | -0.97                        | 0.42                          | 0.71                          | 0.29                          |
| 14 March 2018                        | -1.74           | -1.38          | 0.86             | -0.65            | -0.89          | -0.98           | -0.71                        | -0.81                         | -0.36                         | -0.37                         |
| 15 March 2018                        | -0.27           | -0.96          | -1.38            | -0.86            | 0.87           | -0.84           | -                            | -0.60                         | -0.95                         | -0.53                         |
| 15 March 2018                        | 1.75            | 1.00           | 0.75             | 1.75             | -0.23          | 0.80            | -                            | 2.17                          | -0.90                         | 0.07                          |

“–” represent no data.

Continued Table S3

| Sampling Time<br>(day month<br>year) | Na <sup>+</sup> | K <sup>+</sup> | Mg <sup>2+</sup> | Ca <sup>2+</sup> | F <sup>-</sup> | Cl <sup>-</sup> | NO <sub>3</sub> <sup>-</sup> | SO <sub>4</sub> <sup>2-</sup> | CO <sub>3</sub> <sup>2-</sup> | HCO <sub>3</sub> <sup>-</sup> |
|--------------------------------------|-----------------|----------------|------------------|------------------|----------------|-----------------|------------------------------|-------------------------------|-------------------------------|-------------------------------|
| 15 March 2018                        | -0.78           | -0.38          | 0.22             | -0.52            | -0.67          | -0.19           | 1.99                         | -0.42                         | -0.59                         | -0.88                         |
| 15 March 2018                        | 0.28            | -0.01          | -0.74            | 2.05             | -0.14          | -0.54           | -                            | 1.61                          | -1.08                         | -0.86                         |
| 15 March 2018                        | 0.51            | 1.07           | -1.04            | 1.06             | 0.06           | -0.47           | -                            | 0.99                          | -0.27                         | -0.76                         |
| 16 March 2018                        | 0.34            | -0.54          | -1.35            | -0.85            | 2.62           | -0.67           | -                            | -0.80                         | 0.97                          | 0.57                          |
| 16 March 2018                        | -0.18           | -0.46          | 1.83             | -0.80            | -0.88          | 2.91            | -0.56                        | -0.77                         | 0.48                          | 1.02                          |
| 16 March 2018                        | -0.99           | -0.31          | 0.80             | -0.62            | -0.88          | -0.09           | -0.23                        | -0.52                         | -0.30                         | -0.56                         |
| 16 March 2018                        | -0.95           | -0.59          | 0.88             | -0.62            | -0.84          | -0.19           | 0.49                         | -0.50                         | -0.30                         | -0.68                         |
| 2 May 2019                           | 0.62            | -0.42          | -1.06            | -1.05            | 1.91           | -0.40           | -0.65                        | -0.63                         | 0.23                          | 1.08                          |
| 6 May 2019                           | 0.64            | 0.37           | 0.00             | -0.15            | -0.33          | -0.20           | -0.29                        | -0.60                         | 1.46                          | 3.21                          |
| 6 May 2019                           | -1.27           | -0.96          | 0.69             | 0.25             | -              | -0.44           | 0.73                         | -0.64                         | 0.40                          | 1.60                          |
| 7 May 2019                           | 0.76            | 1.16           | -0.76            | 0.42             | -0.29          | -0.36           | -                            | 2.26                          | -1.77                         | 0.04                          |
| 7 May 2019                           | 1.51            | 1.97           | -0.54            | -0.49            | 0.52           | -0.33           | -0.64                        | 1.00                          | -1.42                         | 1.10                          |
| 7 May 2019                           | -1.26           | -0.82          | 1.92             | -0.23            | -1.11          | -0.46           | -0.55                        | -0.64                         | 0.17                          | 1.40                          |
| 7 May 2019                           | -1.06           | -0.67          | 0.83             | 2.29             | -1.18          | 2.64            | 2.16                         | -0.48                         | 0.58                          | 1.44                          |
| 8 May 2019                           | 0.06            | -0.63          | -1.07            | -1.04            | 0.49           | -0.43           | -0.77                        | -0.28                         | 0.35                          | -0.32                         |

“—” represent no data.
